# Supplementary material
Source: ML conference proceedings conference paper supplement (https://openreview.net/forum?id=50I7q86igD)
Supplement: supplementary_material [file attachment]

---

# Supplementary Material

---

Anonymous Author(s)

Affiliation

Address

email

## 1 Mean Prediction and UQ of prediction

Given the main advantage of Deep Evidence Regression over other UQ aware deep learning methods like Bayesian NN, esembling etc, is due to existence of analytical solution for both predictions and unceratinty from NN output, without the need for sampling. Hence this section details the derivation of mean prediction and total uncertainty.

### 1.1 Mean Prediction

We define the mean prediction as  $E[Z|\alpha, \beta]$  (1)

where  $Z = E[y_i]$  (2)

Now given  $y_i \sim Weibull(k, \lambda)$  (3)

$$Z = E[\lambda * \Gamma(1 + \frac{1}{k})] = E(\lambda) * \Gamma(1 + \frac{1}{k}) \quad (k \text{ is known}) \quad (4)$$

$$E[\lambda] = \int_{\lambda} \lambda p(\lambda) d\lambda \quad (5)$$

(6)

Hence to solve for mean prediction we need to find pdf  $p(\lambda)$ . Because we know  $\theta = \lambda^k \sim \Gamma^{-1}(\alpha, \beta)$ , we can use change of variable to find pdf of  $\lambda$  [2].

$$p(\lambda|\alpha, \beta) = p_{\theta}(\lambda^k) * \left| \frac{d\lambda^k}{d\lambda} \right| \quad (7)$$

$$= \frac{\beta^{\alpha}}{\Gamma(\alpha)} \left( \frac{1}{\lambda^k} \right)^{\alpha+1} \exp \left( -\frac{\beta}{\lambda^k} \right) * |k\lambda^{k-1}| \quad (8)$$

$$= \frac{\beta^{\alpha}}{\Gamma(\alpha)} \left( \frac{1}{\lambda^k} \right)^{\alpha+1} \exp \left( -\frac{\beta}{\lambda^k} \right) * k\lambda^{k-1} \quad (\text{given } \lambda, k > 0) \quad (9)$$

9 Hence,

$$E[\lambda] = \int_{\lambda} \lambda \frac{\beta^{\alpha}}{\Gamma(\alpha)} \left(\frac{1}{\lambda^k}\right)^{\alpha+1} \exp\left(-\frac{\beta}{\lambda^k}\right) * k \lambda^{k-1} d\lambda \quad (10)$$

$$= \frac{k\beta^{\alpha}}{\Gamma(\alpha)} \int_{\lambda=0}^{\infty} \frac{1}{\lambda^{k\alpha+k-k}} \exp\left(\frac{\beta}{\lambda^k}\right) d\lambda \quad (11)$$

Substituting  $t = 1/\lambda$ , we get: (12)

$$dt = -1/\lambda^2 d\lambda, \quad (13)$$

$$E[\lambda] = \frac{k\beta^{\alpha}}{\Gamma(\alpha)} \int_{t=0}^{\infty} t^{k\alpha-2} \exp(-\beta t^k) dt \quad (14)$$

By table of integrals at [3] (15)

$$\int_0^{\infty} y^m e^{-by^k} dy = \frac{\Gamma\left(\frac{m+1}{k}\right)}{kb^{(m+1)/k}} \quad (16)$$

$$\Rightarrow E[\lambda] = \frac{k\beta^{\alpha}}{\Gamma(\alpha)} * \Gamma\left(\frac{k\alpha-1}{k}\right) * \frac{1}{k} * \frac{1}{\beta^{\frac{k\alpha-1}{k}}} \quad (17)$$

10 Hence we get the mean prediction as:

$$Z = E[y_i|\alpha, \beta] = E(\lambda) * \Gamma\left(1 + \frac{1}{k}\right) \quad (18)$$

$$= \frac{k\beta^{\alpha}}{\Gamma(\alpha)} * \Gamma\left(\frac{k\alpha-1}{k}\right) * \frac{1}{k} * \frac{1}{\beta^{\frac{k\alpha-1}{k}}} * \Gamma\left(1 + \frac{1}{k}\right) \quad (19)$$

$$= \Gamma\left(1 + \frac{1}{k}\right) \frac{1}{\Gamma(\alpha)} \Gamma\left(\alpha - \frac{1}{k}\right) * \beta^{1/k} \quad (20)$$

## 11 1.2 UQ of Prediction

12 We quantify the total uncertainty as  $Var(Z)$  with defined as above, i.e.  $Z = E[y_i]$

$$Var(Z) = Var\left(\lambda * \Gamma\left(1 + \frac{1}{k}\right)\right) \quad (21)$$

$$Var(Z|\alpha, \beta) = Var(\lambda) * \Gamma^2\left(1 + \frac{1}{k}\right) \quad (22)$$

$$= (E[\lambda^2] - E[\lambda]) * \Gamma^2\left(1 + \frac{1}{k}\right) \quad (23)$$

With  $E(\lambda)$  defined as in 18, we only need  $E(\lambda^2)$  (24)

Similar to approach outlined in 1.1, we get: (25)

$$E[\lambda^2] = \int_{\lambda} \lambda^2 p(\lambda) d\lambda \quad (26)$$

$$E[\lambda^2] = \frac{k\beta^{\alpha}}{\Gamma(\alpha)} * \Gamma\left(\frac{k\alpha-2}{k}\right) * \frac{1}{k} * \frac{1}{\beta^{\frac{k\alpha-2}{k}}} \quad (27)$$

$$\Rightarrow E[Z^2] = \Gamma^2\left(1 + \frac{1}{k}\right) \frac{1}{\Gamma(\alpha)} \Gamma\left(\alpha - \frac{2}{k}\right) * \beta^{2/k} \quad (28)$$

13 Similar to approach outlined in 1.1, we get:

$$E[\lambda^2|\alpha, \beta] = \Gamma\left(\frac{k\alpha-2}{k}\right) \frac{\beta^{2/k}}{\Gamma(\alpha)} \quad (29)$$

14 Hence we can write

$$Var(Z) = \Gamma^2(1 + \frac{1}{k}) * [\Gamma(\frac{k\alpha - 2}{k}) \frac{\beta^{2/k}}{\Gamma(\alpha)} - (\Gamma(\frac{k\alpha - 1}{k}) \frac{\beta^{1/k}}{\Gamma(\alpha)})^2] \quad (30)$$

15 OR

$$Var(Z) \propto \frac{\beta^{2/k}}{\Gamma(\alpha)^2} [\Gamma(\alpha) \Gamma(\frac{k\alpha - 2}{k}) - \Gamma^2(\frac{k\alpha - 1}{k})]$$

### 16 1.3 Validation of proofs

17 Here we generate a target variable following a Weibull distribution. The target variable is generated  
18 as:

$$19 y_i = x_i^2 + \epsilon, \epsilon \sim Weibull(k = 1.2, \lambda = 0.2)$$

20 The train set is comprised of  $x \in [0, 3]$  while test set is  $x \in [0, 4]$ .

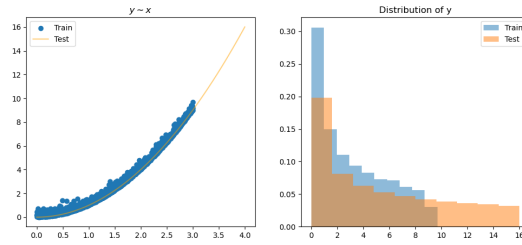

Figure 1: y vs x and Distribution of y(right) for synthetic data

21 Since our approach assumes known  $k$ ,  $k$  is estimated from the training set.

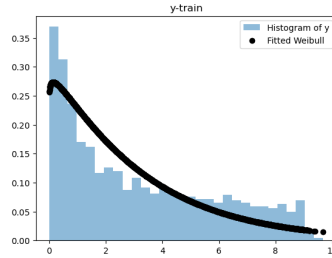

Figure 2: Weibull Fit on Train data

22 To confirm that analytical calculations outlined above, we have also created the mean prediction  
23 after sampling from the NN outputs. Firstly we sample  $\theta$  from  $\Gamma(\alpha, \beta)$ .  $\lambda$  is then calculated as the  
24  $k$ -th root of  $\theta$  or  $\lambda = \theta^{1/k}$ . Finally, the response variable  $y_i$  can be sampled as  $Weibull(\lambda, k)$ . The  
25 consistency between the results from sampling and analytical calculations, supports the analytical  
26 calculations in 18.

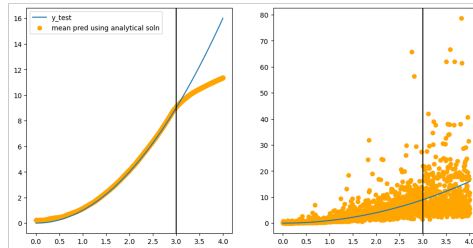

Figure 3: Mean prediction using analytical equation(left) vs from sampling (right)

## 27 2 Experiment Code and Results

28 The code and corresponding dataset is shared alongwith

### 29 2.1 Experiments on synthetic data

30 In the experiment, both approaches utilized an identical neural network architecture consisting of  
 31 five hidden layers, with each layer comprising 200 neurons. To enhance the model’s performance,  
 32 hyperparameter optimization was conducted on the regularization cost, denoted as ‘c.’ This opti-  
 33 mization involved varying the value of ‘c’ within the logarithmic space ranging from 0.000001 to  
 34 0.1. For each lambda value, the best model was selected based on the value of ‘c’ that minimized  
 35 the training loss, adhering to the outlined procedure. This approach allowed for fine-tuning the reg-  
 36 ularization parameter and ensuring that the chosen models were optimized for the given experiment.

37 Qualitatively we can see that the benchmark version either captures no uncertainty in prediction or  
 38 amplifies it way too much for different c values.

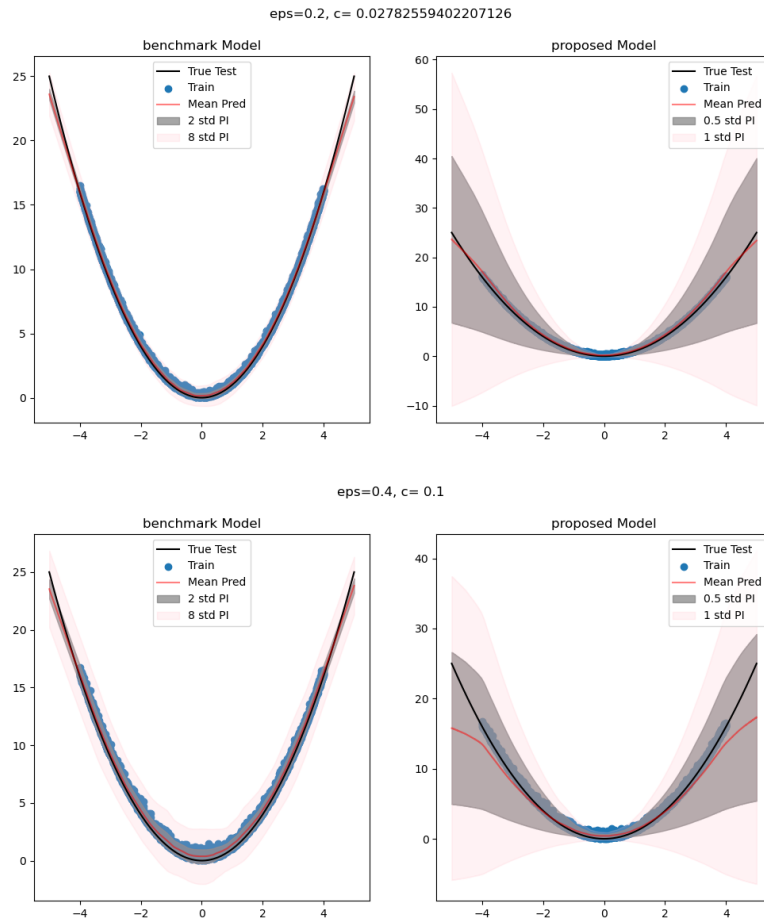

Figure 4: Deep evidence regression (left) vs Weibull evidence Regression (right). We see that uncertainty is much better captured by proposed version.

### 39 2.2 Experiments on Recovery data

40 The dataset under consideration pertains to peer to peer mortgage lending data during the period of  
 41 2007 to 2014 sourced from Kaggle [1]. However, the data does not include the loss given default  
 42 values. Instead, the recovery rate has been used as a proxy, which is calculated as the ratio of

recoveries made to the origination amount. The dataset contains approximately 46 variables denoted as 'x,' which include features such as the time since the loan was issued, debt-to-income ratio (DTI), joint applicant status, and delinquency status, among others. In total, the dataset comprises around 23,000 rows.

The model architecture for Benchmark model is as follows:

| Layer (type)                             | Output Shape | Param # |
|------------------------------------------|--------------|---------|
| dense_100 (Dense)                        | (None, 1)    | 46      |
| dense_101 (Dense)                        | (None, 350)  | 700     |
| dense_102 (Dense)                        | (None, 300)  | 105300  |
| dense_103 (Dense)                        | (None, 300)  | 90300   |
| dense_104 (Dense)                        | (None, 250)  | 75250   |
| dense_105 (Dense)                        | (None, 250)  | 62750   |
| dense_106 (Dense)                        | (None, 200)  | 50200   |
| dense_107 (Dense)                        | (None, 200)  | 40200   |
| dense_108 (Dense)                        | (None, 200)  | 40200   |
| dense_normal_gamma_5 (Dense NormalGamma) | (None, 4)    | 804     |
| Total params: 465,750                    |              |         |
| Trainable params: 465,750                |              |         |
| Non-trainable params: 0                  |              |         |

The model architecture for Proposed model is as follows:

| Layer (type)      | Output Shape | Param # |
|-------------------|--------------|---------|
| dense_110 (Dense) | (None, 1)    | 46      |
| dense_111 (Dense) | (None, 350)  | 700     |
| dense_112 (Dense) | (None, 300)  | 105300  |
| dense_113 (Dense) | (None, 300)  | 90300   |
| dense_114 (Dense) | (None, 250)  | 75250   |
| dense_115 (Dense) | (None, 250)  | 62750   |
| dense_116 (Dense) | (None, 200)  | 50200   |
| dense_117 (Dense) | (None, 200)  | 40200   |
| dense_118 (Dense) | (None, 200)  | 40200   |

```

99 dense_weibull_gamma_5 (Dens (None, 2) 402
100 eWeibullGamma)

```

```

101
102 =====
103 Total params: 465,348
104 Trainable params: 465,348
105 Non-trainable params: 0
106 -----

```

107 Hyperparameter optimization was conducted on the regularization cost, denoted as 'c.' This op-  
108 timization involved varying the value of 'c' within the linear space ranging from 0.4 to 1.2 for  
109 proposed version and 0.04 to 0.12 for benchmark version. For each lambda value, the best model  
110 was selected based on the value of 'c' that minimized the training loss, adhering to the outlined  
111 procedure. This approach allowed for fine-tuning the regularization parameter and ensuring that the  
112 chosen models were optimized for the given experiment. Finally NN is trained for 4 times with the  
113 best c value.

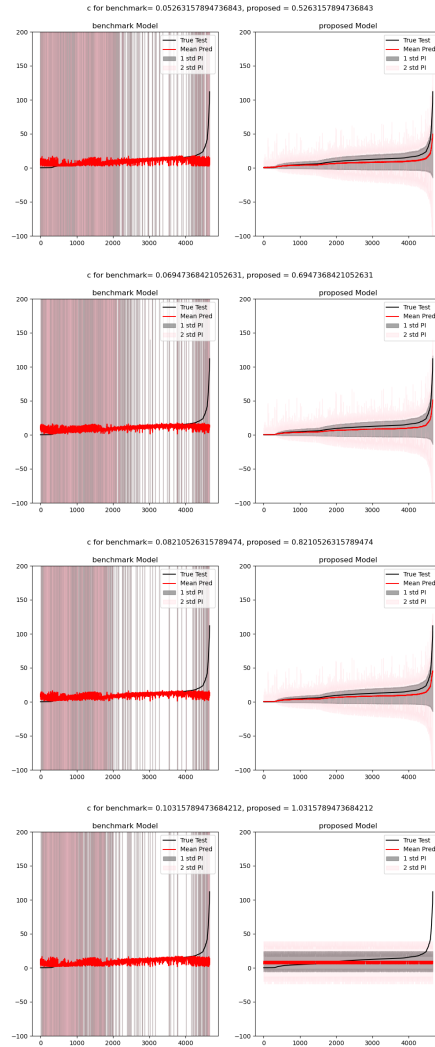

Figure 5: Deep evidence regression (left) vs Weibull evidence Regression (right). We see that uncertainty is much better captured by proposed version.

## 114 **References**

- 115 [1] Shawn Sun. Loan data for credit risk modeling. [https://www.kaggle.com/datasets/](https://www.kaggle.com/datasets/shawnysun/loan-data-for-credit-risk-modeling)  
116 [shawnysun/loan-data-for-credit-risk-modeling](https://www.kaggle.com/datasets/shawnysun/loan-data-for-credit-risk-modeling), 2021.
- 117 [2] Wikipedia contributors. Change of variables — Wikipedia, the free encyclopedia, 2023. [On-  
118 line; accessed 1-May-2023].
- 119 [3] Wikipedia contributors. List of integrals of exponential functions — Wikipedia, the free ency-  
120 clopedia. [https://en.wikipedia.org/w/index.php?title=List\\_of\\_integrals\\_of\\_](https://en.wikipedia.org/w/index.php?title=List_of_integrals_of_exponential_functions&oldid=1142840420)  
121 [exponential\\_functions&oldid=1142840420](https://en.wikipedia.org/w/index.php?title=List_of_integrals_of_exponential_functions&oldid=1142840420), 2023. [Online; accessed 1-May-2023].
